# Supplementary material
Source: PubMed Central journal article supplement (PMC3322893)
Supplement: supp_M111.306340_jbc.M111.306340-1.pdf [file supp_M111.306340_jbc.M111.306340-1.pdf]

## Supplementary Experimental Procedures and Data

### SUPPLEMENTARY EXPERIMENTAL PROCEDURES

*Spheroid assay.* A stock Methocel solution was prepared by dissolving previously autoclaved 6 g of methylcellulose (4000 centipoises, Sigma-Aldrich) in 500 ml of DMEM. Transfected cells were trypsinized and  $7.5 \times 10^4$  cells were resuspended in 15 ml of DMEM with 20% Methocel. 150  $\mu$ l of the cell suspension was added per well of a U-bottom 96 well suspension plate (Greiner Bio-One, Stonehouse, UK) and incubated for 16h at 37°C for spheroid formation. A solution of 1.5 mg/ml rat-tail collagen type-I (BD Biosciences) was prepared in DMEM and neutralised by dropwise addition of 1M NaOH. An initial layer of 100  $\mu$ l of the collagen solution was added per well of a 12-well plate and allowed to set at 37°C for 30 min. Spheroids were harvested and resuspended in a freshly prepared collagen solution, and 100  $\mu$ l was added on top of the previously prepared layer, and allowed to set at 37°C for 1.5h. After the collagen set, 1.5 ml of DMEM medium was added to each well and spheroids were left to invade for 40h before being fixed with 4% PFA in PBS. 10 spheroids were imaged from 2 different wells per condition and the total area of invasion for each spheroid was calculated using the Metamorph® imaging software (Molecular Devices, Sunnyvale, CA).

**SUPPLEMENTARY FIGURE 1.** MT1-MMP mono-ubiquitination does not regulate protein degradation. *A.* MCF-7 cells were transfected with pcDNA3.1, Ubiquitin-HA and MT1-MYC as indicated and cells were incubated for 3h with DMSO or 25, 50 or 75  $\mu$ M MG-132. Cell extracts were immunoblotted with an anti-Myc, an anti-p21, an anti-HA and an anti- $\beta$ -Actin antibody. \*, non-specific band. *B.* MCF-7 cells were transfected with pcDNA3.1, MT1-WT, MT1-K581R or MT1- $\Delta$ ICD and cell extracts were immunoblotted with an anti-MT1-MMP (LEM-2/15.8) or an anti- $\beta$ -Actin antibody. The semi-quantitative analyses of band intensities of four different immunoblots are shown  $\pm$  SEM.

**SUPPLEMENTARY FIGURE 2.** Ablation of MT1-MMP ubiquitination does not alter the localisation of MT1-MMP in respect to Rab7, Rab4, Rab6 or Rab11. MCF-7 cells were transfected with MT1-WT, MT1-Y573A, MT1-K581R or MT1- $\Delta$ ICD and co-transfected with Rab7-, Rab4-, Rab6- or Rab11-EGFP. 16h after transfection the cells were fixed, permeabilised and stained with an anti-MT1-MMP (N175/6; Cy5 secondary, red) antibody. Inset panels show magnified portions of each merged image, as indicated (dashed squares). Bars represent a distance of 25  $\mu$ m. The co-localisation of the different MT1-MMP constructs with the Rab-EGFP constructs was determined using the Volocity 3D imaging and analysis software of single confocal optical sections. Data represent the co-localisation co-efficients  $\pm$ SEM of 6 optical sections.

**SUPPLEMENTARY FIGURE 3.** Ablation of MT1-MMP ubiquitination has no effect on invasion from 3-dimensional multicellular spheroids through type-I collagen. Wild type MCF-7 cells or MCF-7 cells expressing either pcDNA3.1, MT1-WT, MT1-Y573A, MT1-K581R or MT1- $\Delta$ ICD, were assembled into multicellular spheroids and incubated within a 1.5 mg/ml rat-tail collagen type-I gel for 40 h. *A.* Representative images of spheroids containing different transfected cells after 40h incubation in collagen. White bars represent a distance of 100  $\mu$ m. *B.* Total area of invasion was determined using the Metamorph® imaging software. Data represents total area of invasion per spheroid calculated for a total of 10 spheroids from 2 different wells per condition with  $P < 0.0001$  (\*\*\*) and  $P < 0.01$  (\*). *ns*, not significant.
