# Supplementary material
Source: PubMed Central journal article supplement (PMC3322893)

# Supplementary Figure 1

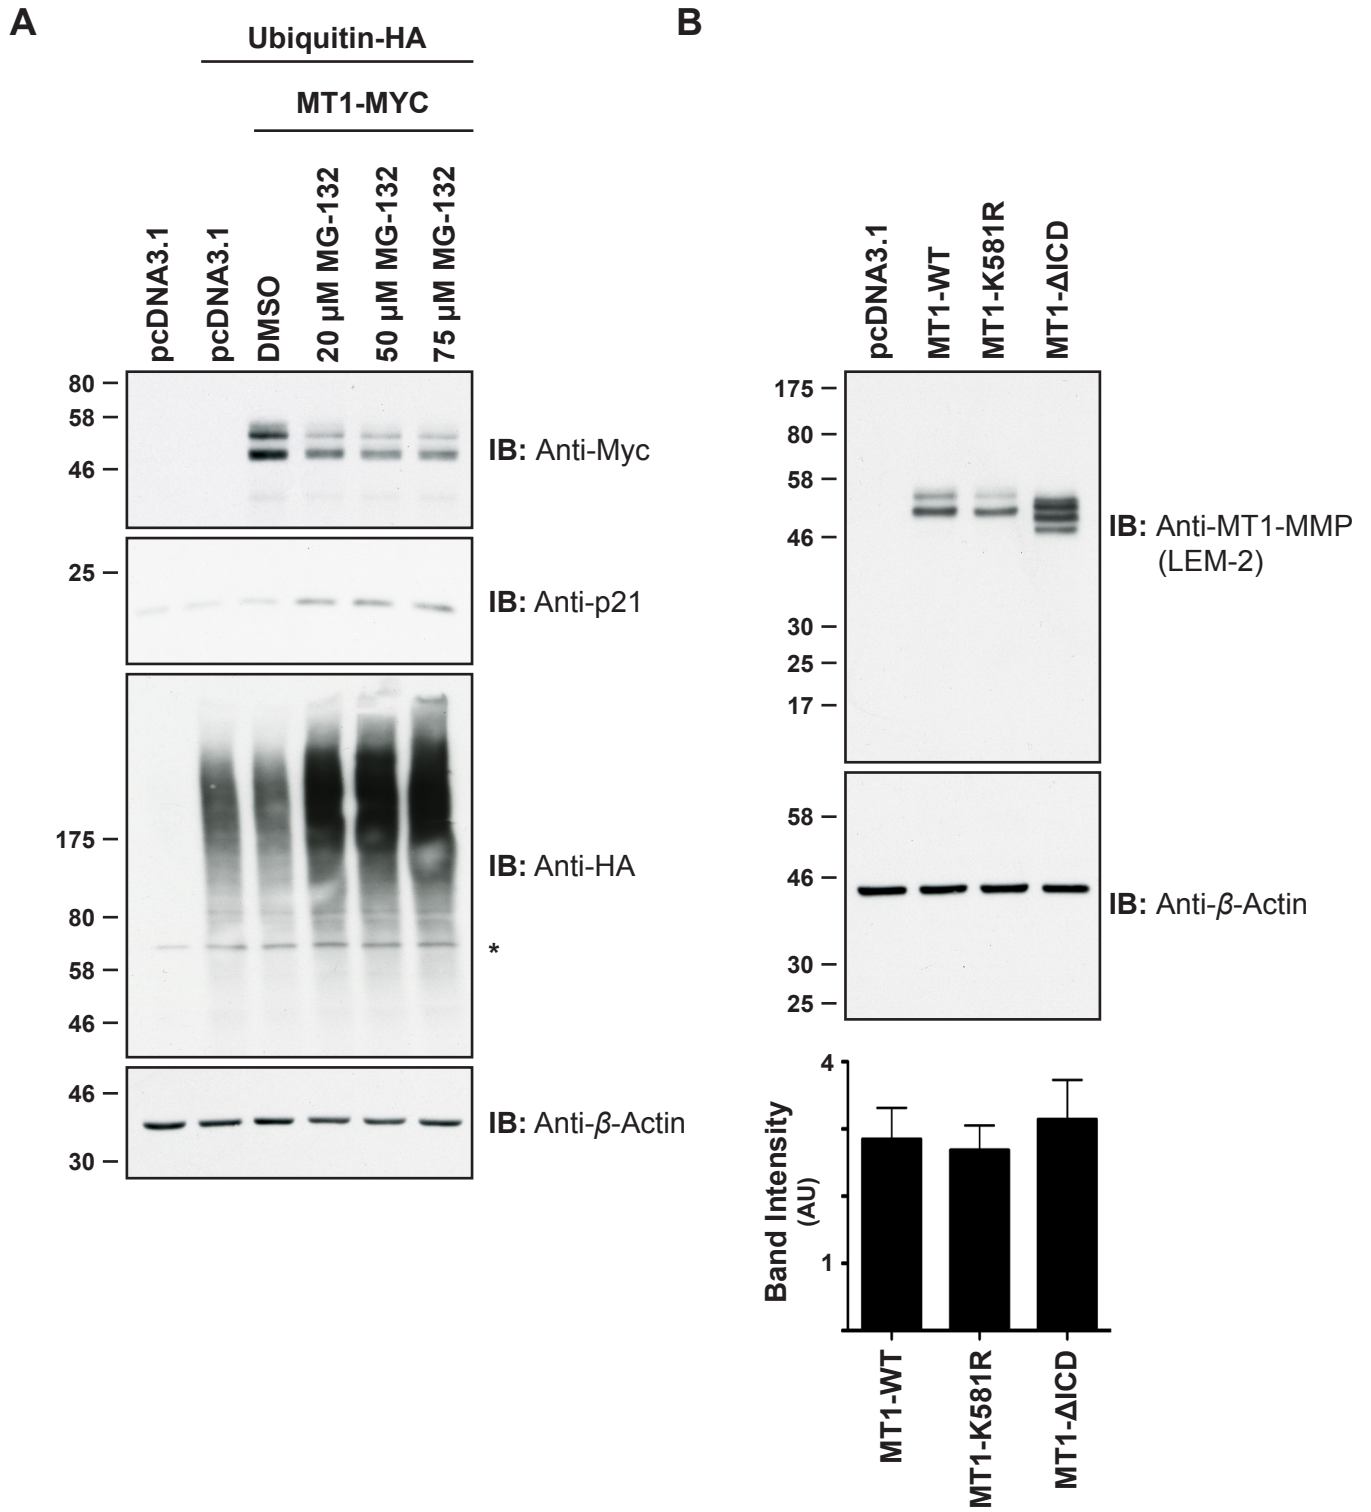

Supplement: supp_M111.306340_jbc.M111.306340-2.pdf [file supp_M111.306340_jbc.M111.306340-2.pdf]

Supplementary Figure 2

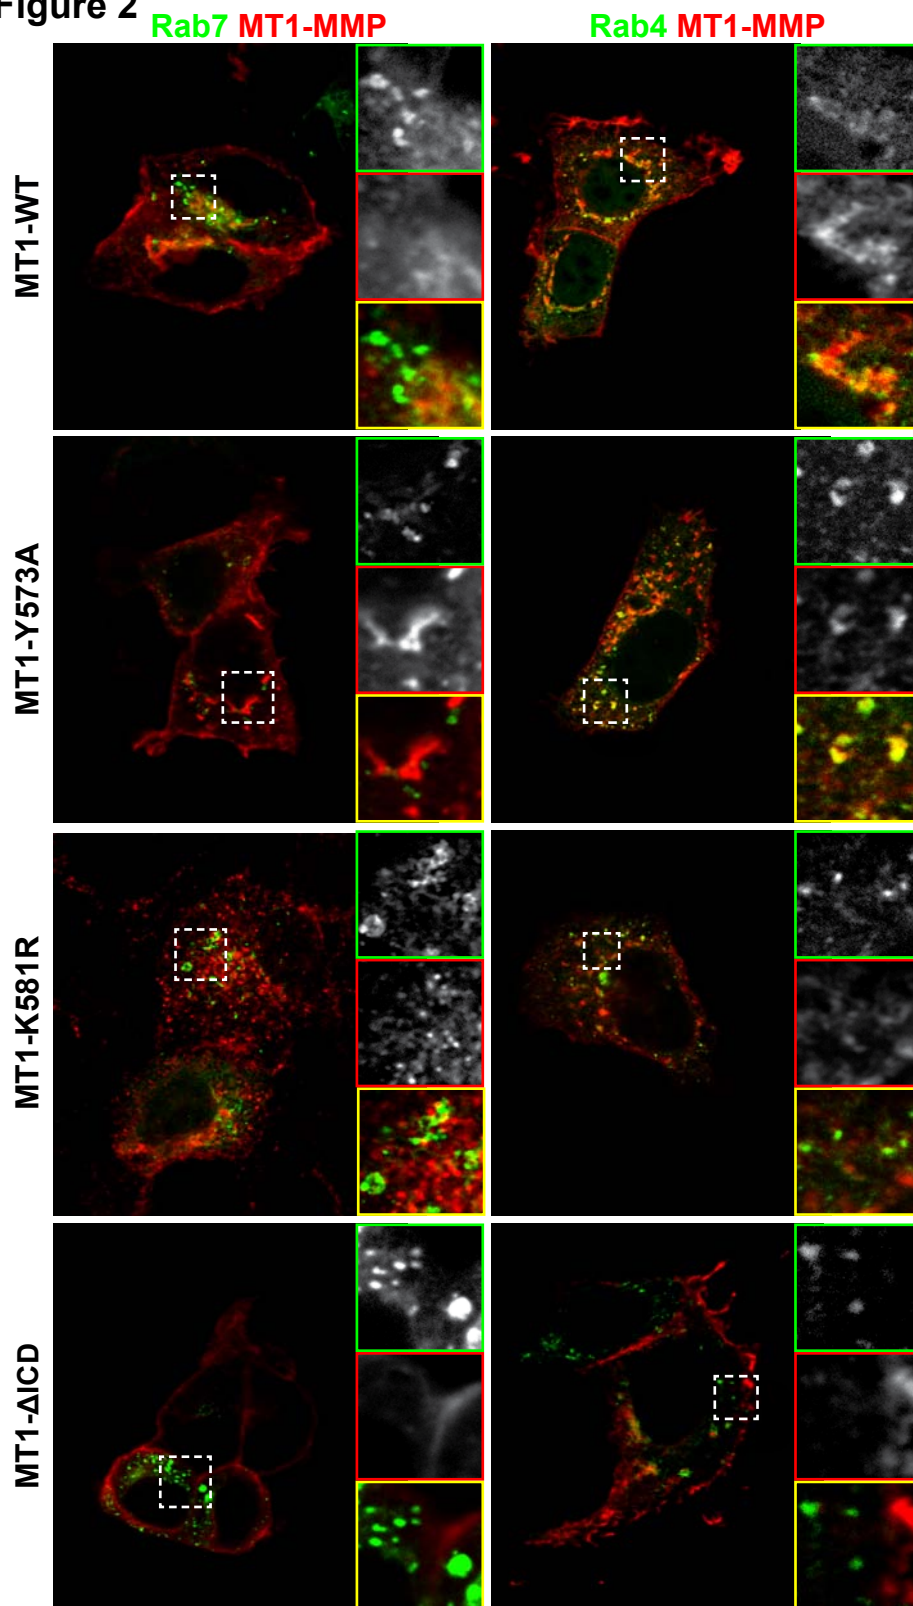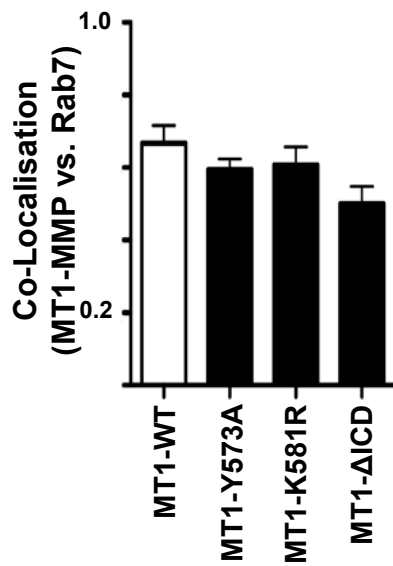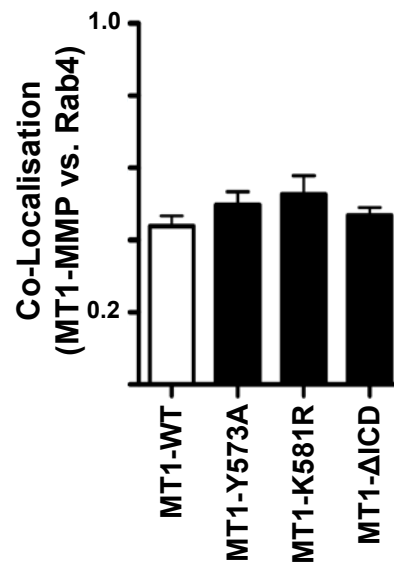

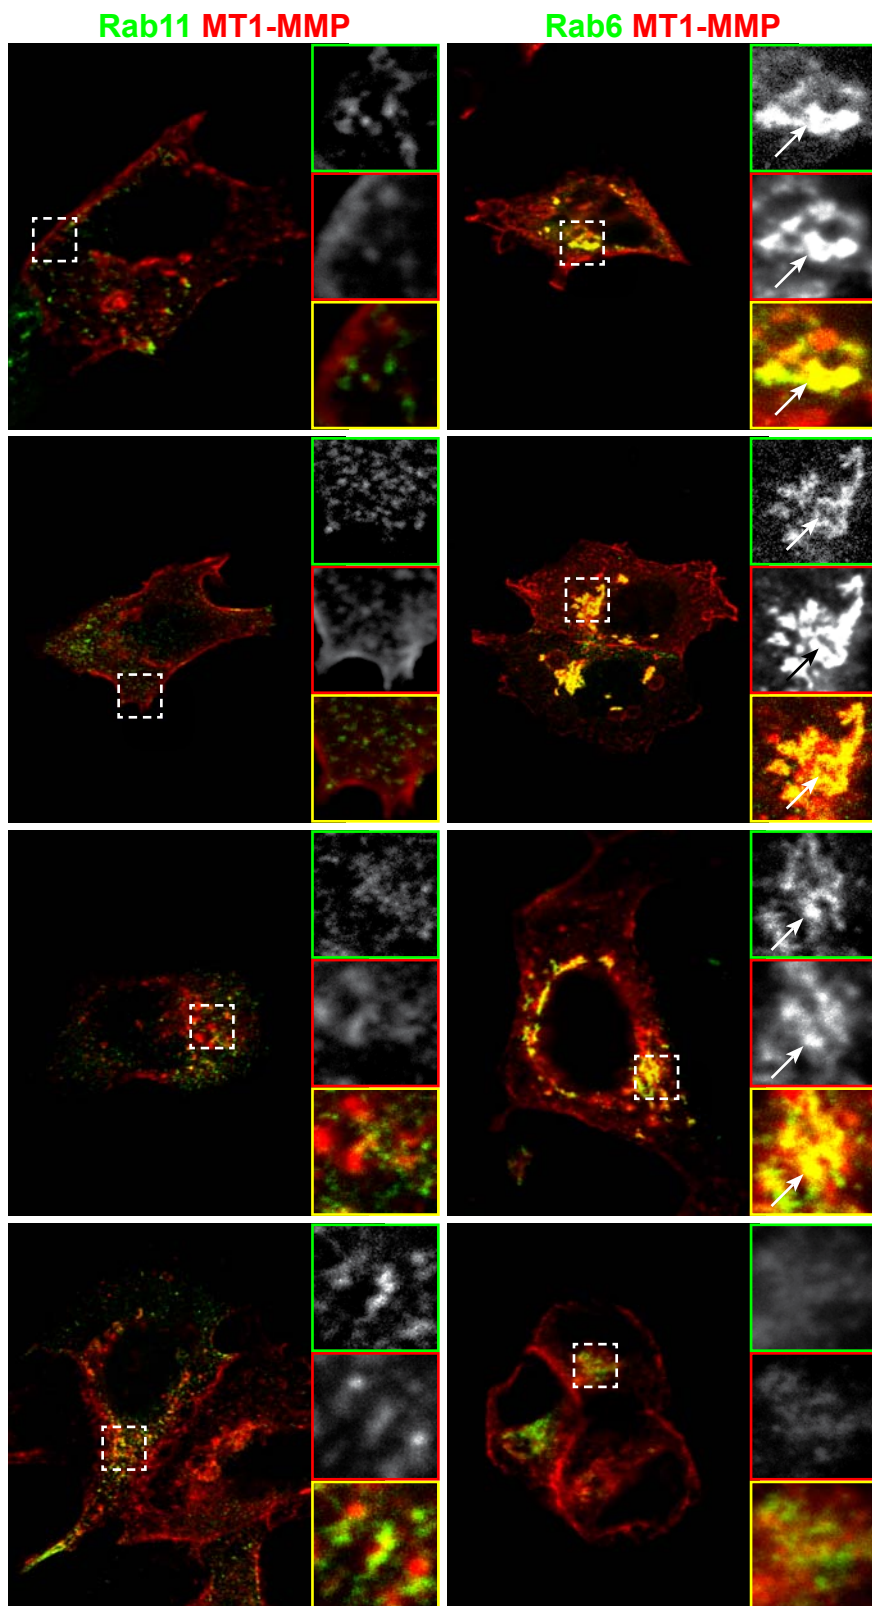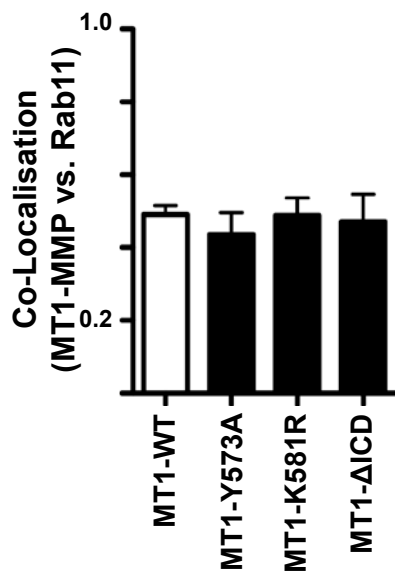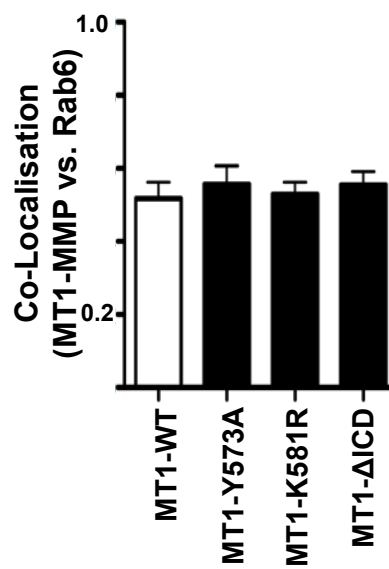

Supplement: supp_M111.306340_jbc.M111.306340-3.pdf [file supp_M111.306340_jbc.M111.306340-3.pdf]

Supplementary Figure 3

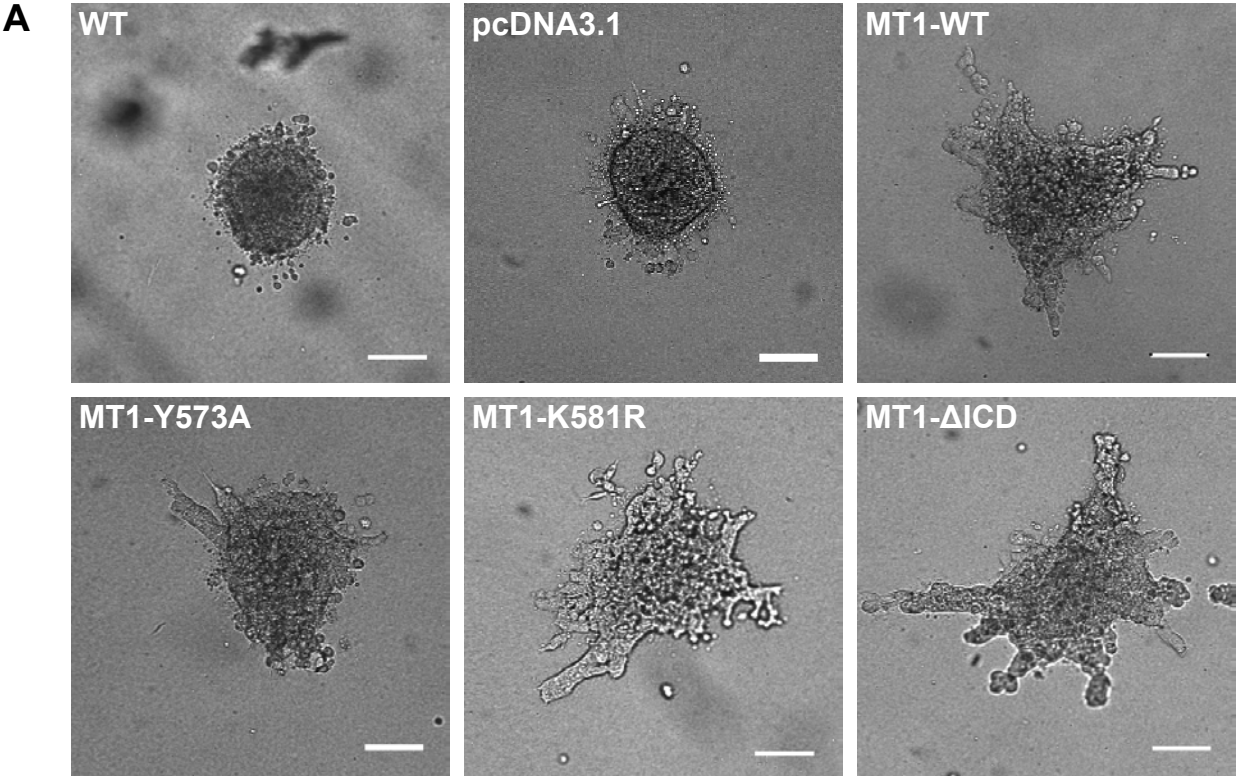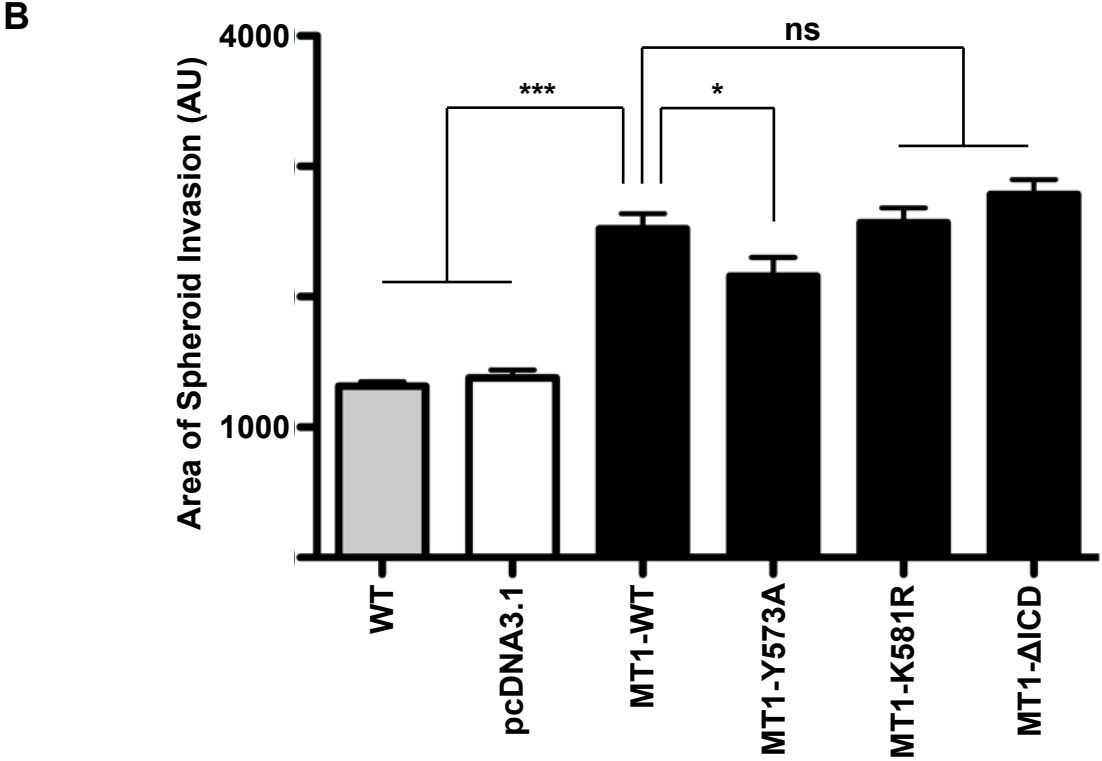

Supplement: supp_M111.306340_jbc.M111.306340-4.pdf [file supp_M111.306340_jbc.M111.306340-4.pdf]
